# Supplementary material
Source: PubMed Central journal article supplement (PMC7301306)

## Supplementary Online Content

Liu S-D, Chen W-T, Chi C-C. Association between medication use and bullous pemphigoid: a systematic review and meta-analysis. *JAMA Dermatol*. Published online June 17, 2020. doi:10.1001/jamadermatol.2020.1587

**eTable 1.** PubMed, Cochrane Central Register of Controlled Trials, and Embase Databases Search Strategy

**eTable 2.** Characteristics of Included Studies for the Class of Diuretics

**eTable 3.** Characteristics of Included Studies for the Class of Antidiabetic Drugs

**eTable 4.** Characteristics of Included Studies for the Class of Psycholeptics

**eTable 5.** Characteristics of Included Studies for the Class of Anti-Parkinson Drugs

**eTable 6.** Characteristics of Included Studies for the Class of Analgesics

**eTable 7.** Characteristics of Included Studies for the Class of Antihypertensives

**eTable 8.** Characteristics of Included Studies for the Class of Antithrombotics

**eTable 9.** Characteristics of Included Studies for the Lipid-Lowering Agents

**eTable 10.** Characteristics of Included Studies for the Class of Antidepressants

**eTable 11.** Characteristics of Included Studies for the Class of Nonsteroidal Anti-inflammatory Drugs

**eTable 12.** Characteristics of Included Studies for The Class of Antibiotics

**eTable 13.** Characteristics of Included Studies for the Class of Gastrointestinal Tract Medications

**eFigure 1.** Association Between Psycholeptics and Bullous Pemphigoid

**eFigure 2.** Association Between Analgesics and Bullous Pemphigoid

**eFigure 3.** Association Between Antihypertensive Drugs and Bullous Pemphigoid

**eFigure 4.** Association Between Antithrombotics and Bullous Pemphigoid

**eFigure 5.** Association Between Lipid-Lowering Agents and Bullous Pemphigoid

**eFigure 6.** Association Between Antidepressants and Bullous Pemphigoid

**eFigure 7.** Association Between Nonsteroidal Anti-inflammatory Drugs and Bullous Pemphigoid

**eFigure 8.** Association Between Antibiotics and Bullous Pemphigoid

**eFigure 9.** Association Between Gastrointestinal Tract Drugs and Bullous Pemphigoid

**eFigure 10.** Sensitivity Analysis on Association Between Antidiabetic Drugs and Bullous Pemphigoid

**eFigure 11.** Sensitivity Analysis on Association Between Psycholeptics and Bullous Pemphigoid

**eFigure 12.** Sensitivity Analysis on Association Between Anti-Parkinson Drugs and Bullous Pemphigoid

This supplementary material has been provided by the authors to give readers additional information about their work.

**eTable 1.** PubMed, Cochrane Central Register of Controlled Trials, and Embase Databases Search Strategy

| PubMed                                         |                                                                  |
|------------------------------------------------|------------------------------------------------------------------|
| # 1                                            | "bullous pemphigoid"[All Fields]                                 |
| # 2                                            | bullous pemphigoid[MeSH Terms]                                   |
| # 3                                            | #1 OR #2                                                         |
| # 4                                            | "drug-related side effects and adverse reactions"[MeSH Terms]    |
| # 5                                            | "adverse drug reaction"                                          |
| # 6                                            | #4 OR #5                                                         |
| # 7                                            | drug related                                                     |
| # 8                                            | drug induced                                                     |
| # 9                                            | drug triggered                                                   |
| #10                                            | drug precipitated                                                |
| #11                                            | drug associated                                                  |
| #12                                            | drug provoked                                                    |
| #13                                            | drug linked                                                      |
| #14                                            | #7 OR #8 OR #9 OR #10 OR #11 OR #12 OR #13                       |
| #15                                            | medication[MeSH Terms]                                           |
| #16                                            | medication                                                       |
| #17                                            | #15 OR #16                                                       |
| #18                                            | #6 OR #14 OR #17                                                 |
| #19                                            | #3 AND #18                                                       |
| Cochrane Central Register of Controlled Trials |                                                                  |
| #1                                             | MeSH descriptor: [Pemphigoid, Bullous] explode all trees         |
| #2                                             | bullous pemphigoid                                               |
| #3                                             | #1 OR #2                                                         |
| #4                                             | drug                                                             |
| #5                                             | MeSH descriptor: [Pharmaceutical Preparations] explode all trees |
| #6                                             | Medication                                                       |
| #7                                             | #4 OR #5 OR #6                                                   |
| #8                                             | #7 AND #3                                                        |
| Embase                                         |                                                                  |
| # 1                                            | bullous AND ('pemphigoid'/exp OR pemphigoid)                     |
| # 2                                            | 'adverse drug reaction'                                          |
| # 3                                            | 'drug related'                                                   |
| # 4                                            | 'drug induced'                                                   |

# 5 'drug triggered'  
# 6 'drug precipitated'  
# 7 'drug associated'  
# 8 'drug provoked'  
# 9 'drug linked'  
#10 #2 OR #3 OR #4 OR #5 OR #6 OR #7 OR #8 OR #9  
#11 #1 AND #10

**eTable 2.** Characteristics of Included Studies for the Class of Diuretics

| First author, year, country                  | Study design | Case/Control group | Case/control numbers and odds ratio (95% confidence interval) for |                         |                      |                          |
|----------------------------------------------|--------------|--------------------|-------------------------------------------------------------------|-------------------------|----------------------|--------------------------|
|                                              |              |                    | Aldosterone antagonists                                           | Thiazide                | Loop                 | Any                      |
| Bastuji-Garin, 1996, <sup>40</sup><br>France | Case-control | 116/216            | 15/10; 3.1 (1.4-7.1)                                              | 22/26; 1.3 (0.6-2.7)    | 17/27                | 42/53; 1.8 (1.1-2.9)     |
| Bastuji-Garin, 2011, <sup>33</sup><br>France | Case-control | 201/345            | 26/26; 1.90 (1.06–3.40)                                           | 20/42; 0.81 (0.46–1.44) | 1.21 (0.79–1.84)     | 73/111; 1.22 (0.84–1.76) |
| Benzaquen, 2018, <sup>41</sup><br>France     | Case-control | 61/122             | NA                                                                | NA                      | NA                   | 28/69                    |
| Lee, 2019, <sup>15</sup><br>Korea            | Case-control | 670/670            | 63/42                                                             | 145/124                 | 160/136              | NA                       |
| Lloyd-Lavery, 2013, <sup>21</sup><br>UK      | Case-control | 86/134             | 3/5                                                               | 16/23                   | 20/15; 3.8 (1.5–9.7) | 36/39                    |
| Nozu, 2010, <sup>42</sup><br>Japan           | Case-control | 5/31               | 0/6                                                               | NA                      | NA                   | NA                       |
| Tan, 2017, <sup>45</sup><br>Singapore        | Case-control | 105/315            | NA                                                                | 4/6                     | 2/18                 | NA                       |

Abbreviation: NA, not available.

**eTable 3.** Characteristics of Included Studies for the Class of Antidiabetic Drugs

| First author, year, country               | Study design | Case/Control group | Case/control numbers and odds ratio (95% confidence interval) for |                          |              |                    |                                   |                     |
|-------------------------------------------|--------------|--------------------|-------------------------------------------------------------------|--------------------------|--------------|--------------------|-----------------------------------|---------------------|
|                                           |              |                    | Dipeptidyl peptidase 4 inhibitors                                 | Metformin                | Sulfonylurea | Thiazolidinediones | Glucagon-like peptide 1 analogues | Any                 |
| Bastuji-Garin, 1996, <sup>40</sup> France | Case-control | 116/216            | NA                                                                | NA                       | NA           | NA                 | NA                                | 3/9                 |
| Benzaquen, 2018, <sup>41</sup> France     | Case-control | 61/122             | 22/28; 2.64 (1.19-5.85)                                           | NA                       | NA           | NA                 | NA                                | NA                  |
| Kridin, 2018, <sup>22</sup> Israel        | Case-control | 82/328             | 36/71; 3.16 (1.86-5.37)                                           | 51/218; 0.83 (0.51-1.38) | NA           | NA                 | NA                                | NA                  |
| Lee, 2019, <sup>15</sup> Korea            | Case-control | 670/670            | 260/188; 1.58 (1.25-2.00)                                         | NA                       | NA           | NA                 | NA                                | NA                  |
| Lloyd-Lavery, 2013, <sup>21</sup> UK      | Case-control | 86/134             | NA                                                                | NA                       | NA           | NA                 | NA                                | 9/6; 2.0 (0.3-13.5) |
| Plaquet, 2019, <sup>43</sup> France       | Case-control | 1,787/225,400      | 108/8729                                                          | NA                       | NA           | NA                 | NA                                | NA                  |
| Rosenstock, 2018, <sup>50</sup> USA       | RCT          | 3494/3485*         | 7/0                                                               | NA                       | NA           | NA                 | NA                                | NA                  |

|                                                   |              |            |                                  |                               |                                  |                             |     |    |
|---------------------------------------------------|--------------|------------|----------------------------------|-------------------------------|----------------------------------|-----------------------------|-----|----|
| Schaffer, 2017, <sup>44</sup><br>Switzerland      | Case-control | 23/170     | 9/57; 2.48<br>(0.75–8.3)         | NA                            | NA                               | NA                          | NA  | NA |
| Tan, 2017, <sup>45</sup><br>Singapore             | Case-control | 105/315    | NA                               | 1/10                          | 2/11                             | NA                          | NA  | NA |
| Varpuluoma,<br>2018, <sup>46, 47</sup><br>Finland | Case-control | 3397/12941 | 124/153;<br>2.19 (1.55-<br>3.11) | 432/1178; 1.05<br>(0.88-1.24) | 231/620;<br>0.99 (0.79-<br>1.25) | 28/59; 1.16 (0.63-<br>2.12) | 1/4 | NA |

Abbreviation: NA, not available.

\* linagliptin 5mg per day versus placebo per day

**eTable 4.** Characteristics of Included Studies for The Class of Psycholeptics

| First author, year, country               | Study design | Case/Control group | Case/control numbers and odds ratio (95% confidence interval) for |                        |                                |                           |
|-------------------------------------------|--------------|--------------------|-------------------------------------------------------------------|------------------------|--------------------------------|---------------------------|
|                                           |              |                    | Antipsychotics (N05A)                                             | Anxiolytics (N05B)     | Hypnotics and sedatives (N05C) | Any                       |
| Bastuji-Garin, 1996, <sup>40</sup> France | Case-control | 116/216            | 18/18; 1.9 (0.95-3.8)                                             | 36/80                  | NA                             | NA                        |
| Bastuji-Garin, 2011, <sup>33</sup> France | Case-control | 201/345            | 24/29; 1.6 (0.89-2.75)                                            | 50/72; 1.40 (0.88-2.0) | 30/44; 1.16 (0.70-1.92)        | 106/119; 2.11 (1.46-3.04) |
| Benzaquen, 2018, <sup>41</sup> France     | Case-control | 61/122             | 26/46                                                             | NA                     | NA                             | NA                        |
| Lee, 2019, <sup>15</sup> Korea            | Case-control | 670/670            | NA                                                                | NA                     | NA                             | 173/122                   |
| Lloyd-Lavery, 2013, <sup>21</sup> UK      | Case-control | 86/134             | 6/1                                                               | 7/3; 2.8 (0.6-13.1)*   | NA                             | NA                        |
| Nozu, 2010, <sup>42</sup> Japan           | Case-control | 5/31               | 1/1                                                               | NA                     | NA                             | NA                        |
| Tan, 2017, <sup>45</sup> Singapore        | Case-control | 105/315            | NA                                                                | NA                     | 1/0                            | NA                        |

Abbreviation: NA, not available.

\* Benzodiazepine derivatives.



**eTable 5.** Characteristics of Included Studies for the Class of Anti-Parkinson Drugs

| First author, year, country               | Study design | Case/Control group | Case/control numbers and odds ratio (95% confidence interval) for |                           |                         |
|-------------------------------------------|--------------|--------------------|-------------------------------------------------------------------|---------------------------|-------------------------|
|                                           |              |                    | Anticholinergic drugs                                             | Dopaminergic drugs        | Any                     |
| Bastuji-Garin, 2011, <sup>33</sup> France | Case-control | 201/345            | 2/0                                                               | 19/15; 2.28 (1.12-4.65)   | 21/15; 2.54 (1.26-5.12) |
| Lee, 2019, <sup>15</sup> Korea            | Case-control | 670/670            | NA                                                                | NA                        | 54/46                   |
| Lloyd-Lavery, <sup>21</sup> 2013, UK      | Case-control | 86/134             | NA                                                                | NA                        | 5/4                     |
| Tan, 2017, <sup>45</sup> Singapore        | Case-control | 105/315            | NA                                                                | 2/2                       | NA                      |
| Varpuluoma, 2019, <sup>48</sup> Finland   | Case-control | 3397/12,941        | 16/24; 2.94 (1.42-6.09)                                           | 110/196; 1.85 (1.10-3.12) | NA                      |

Abbreviation: NA, not available.

**eTable 6.** Characteristics of Included Studies for the Class of Analgesics

| First author, year, country                  | Study design | Case/Control group | Case/control numbers and odds ratio (95% confidence interval) for |                         |                          |
|----------------------------------------------|--------------|--------------------|-------------------------------------------------------------------|-------------------------|--------------------------|
|                                              |              |                    | Opioids                                                           | Salicylates             | Any                      |
| Bastuji-Garin, 1996, <sup>40</sup><br>France | Case-control | 116/216            | NA                                                                | NA                      | 29/59                    |
| Bastuji-Garin, 2011, <sup>33</sup><br>France | Case-control | 201/345            | 19/57; 0.5 (0.29-0.88)                                            | 19/52; 0.55 (0.31-0.97) | 34/102; 0.48 (0.31-0.74) |
| Benzaquen, 2018, <sup>41</sup><br>France     | Case-control | 61/122             | NA                                                                | NA                      | 12/22                    |

Abbreviation: NA, not available.

**eTable 7.** Characteristics of Included Studies for the Class of Antihypertensives

| First author, year, country               | Study design | Case/Control group | Case/control numbers and odds ratio (95% confidence interval) for |                                  |                |                         |                         |                         |                         |        |
|-------------------------------------------|--------------|--------------------|-------------------------------------------------------------------|----------------------------------|----------------|-------------------------|-------------------------|-------------------------|-------------------------|--------|
|                                           |              |                    | Angiotensin-converting-enzyme inhibitors                          | Angiotensin II receptor blockers | Alpha-blockers | Beta-blockers           | Calcium channel blocker | Central                 | Vasodilators            | Any    |
| Bastuji-Garin, 1996, <sup>40</sup> France | Case-control | 116/216            | 15/24                                                             | NA                               | NA             | 9/21                    | 23/30                   | 13/17                   | 13/36                   | NA     |
| Bastuji-Garin, 2011, <sup>33</sup> France | Case-control | 201/345            | 57/113; 0.83 (0.56-1.21)                                          | 16/25; 1.12 (0.58-2.16)          | NA             | 39/67; 1.03 (0.66-1.60) | 40/81; 0.83 (0.54-1.27) | 11/14; 1.42 (0.63-3.20) | 37/70; 0.95 (0.58-1.12) | NA     |
| Benzaquen, 2018, <sup>41</sup> France     | Case-control | 61/122             | NA                                                                | NA                               | NA             | NA                      | NA                      | NA                      | NA                      | 47/101 |
| Lee, 2019, <sup>15</sup> Korea            | Case-control | 670/670            | 358/323                                                           |                                  | NA             | 146/122                 | 304/274                 | NA                      | NA                      | NA     |
| Lloyd-Lavery, 2013, <sup>21</sup> UK      | Case-control | 86/134             | 34/50                                                             | NA                               | NA             | 21/21                   | 15/22                   | NA                      | NA                      | 54/74  |

|                                       |                  |         |     |     |     |      |      |    |    |    |
|---------------------------------------|------------------|---------|-----|-----|-----|------|------|----|----|----|
| Tan, 2017, <sup>45</sup><br>Singapore | Case-<br>control | 105/315 | 4/7 | 1/6 | 2/6 | 4/18 | 3/18 | NA | NA | NA |
|---------------------------------------|------------------|---------|-----|-----|-----|------|------|----|----|----|

Abbreviation: NA, not available.

**eTable 8.** Characteristics of Included Studies for the Class of Antithrombotics

| First author, year, country               | Study design | Case/Control group | Case/control numbers and odds ratio (95% confidence interval) for |          |             |              |         |
|-------------------------------------------|--------------|--------------------|-------------------------------------------------------------------|----------|-------------|--------------|---------|
|                                           |              |                    | Aspirin                                                           | Warfarin | Clopidogrel | Dipyridamole | Any     |
| Bastuji-Garin, 2011, <sup>33</sup> France | Case-control | 201/345            | 19/52; 0.55<br>(0.31-0.97)                                        | NA       | NA          | NA           | NA      |
| Benzaquen, 2018, <sup>41</sup> France     | Case-control | 61/122             | NA                                                                | NA       | NA          | NA           | 45/85   |
| Lee, 2019, <sup>15</sup> Korea            | Case-control | 670/670            | NA                                                                | NA       | NA          | NA           | 404/371 |
| Lloyd-Lavery, 2013, <sup>21</sup> UK      | Case-control | 86/134             | 38/34; 1.9<br>(0.9-3.8)                                           | 5/10     | 3/0         | 3/0          |         |
| Tan, 2017, <sup>45</sup> Singapore        | Case-control | 105/315            | 6/15                                                              | NA       | NA          | 1/1          | NA      |

Abbreviation: NA, not available.

**eTable 9.** Characteristics of Included Studies for the Class of Lipid-Lowering Agents

| First author, year, country               | Study design | Case/Control group | Case/control numbers and odds ratio (95% confidence interval) for |                        |      |
|-------------------------------------------|--------------|--------------------|-------------------------------------------------------------------|------------------------|------|
|                                           |              |                    | Statins                                                           | Fibrates               | Any  |
| Bastuji-Garin, 1996, <sup>40</sup> France | Case-control | 116/216            | NA                                                                | NA                     | 3/12 |
| Bastuji-Garin, 2011, <sup>33</sup> France | Case-control | 201/345            | 23/57; 0.66 (0.39-1.12)                                           | 6/22; 0.45 (0.18-1.15) | NA   |
| Benzaquen, 2018, <sup>41</sup> France     | Case-control | 61/122             | 31/71                                                             | NA                     | NA   |
| Lee, 2019, <sup>15</sup> Korea            | Case-control | 670/670            | 359/362                                                           | NA                     | NA   |
| Lloyd-Lavery, 2013, <sup>21</sup> UK      | Case-control | 86/134             | 25/30                                                             | NA                     | NA   |
| Tan, 2017, <sup>45</sup> Singapore        | Case-control | 105/315            | 7/19                                                              | 1/3                    | NA   |

Abbreviation: NA, not available.

**eTable 10.** Characteristics of Included Studies for the Class of Antidepressants

| First author, year, country          | Study design | Case/Control group | Case/control numbers and odds ratio (95% confidence interval) for |                                        |                             |                                             |                       |
|--------------------------------------|--------------|--------------------|-------------------------------------------------------------------|----------------------------------------|-----------------------------|---------------------------------------------|-----------------------|
|                                      |              |                    | Tricyclic antidepressant                                          | Selective serotonin reuptake inhibitor | Tetracyclic antidepressant. | Serotonin–norepinephrine reuptake inhibitor | Any                   |
| Lloyd-Lavery, 2013, <sup>21</sup> UK | Case-control | 86/134             | 7/10                                                              | 6/4                                    | 3/1                         | 4/1                                         | 20/17; 3.3 (0.6-18.7) |
| Tan, 2017, <sup>45</sup> Singapore   | Case-control | 105/315            | 1/1                                                               | 2/0                                    | NA                          | NA                                          | NA                    |

Abbreviation: NA, not available.

**eTable 11.** Characteristics of Included Studies for the Class of Nonsteroidal Anti-inflammatory Drugs

| First author, year, country               | Study design | Case/Control group | Case/control numbers and odds ratio (95% confidence interval) for |
|-------------------------------------------|--------------|--------------------|-------------------------------------------------------------------|
|                                           |              |                    | Nonsteroidal anti-inflammatory drugs                              |
| Bastuji-Garin, 1996, <sup>40</sup> France | Case-control | 116/216            | 7/9                                                               |
| Bastuji-Garin, 2011, <sup>33</sup> France | Case-control | 201/345            | 8/16; 0.84 (0.35-2.02)                                            |
| Benzaquen, 2018, <sup>41</sup> France     | Case-control | 61/122             | 0/12                                                              |
| Lee, 2019, <sup>15</sup> Korea            | Case-control | 670/670            | 177/150                                                           |

Abbreviation: NA, not available.



**eTable 12.** Characteristics of Included Studies for the Class of Antibiotics

| First author, year, country               | Study design | Case/Control group | Case/control numbers and odds ratio (95% confidence interval) for |
|-------------------------------------------|--------------|--------------------|-------------------------------------------------------------------|
|                                           |              |                    | Antibiotics                                                       |
| Bastuji-Garin, 1996, <sup>40</sup> France | Case-control | 116/216            | 4/7                                                               |
| Bastuji-Garin, 2011, <sup>33</sup> France | Case-control | 201/345            | 17/20; 1.52 (0.77-2.98)                                           |
| Lloyd-Lavery, 2013, <sup>21</sup> UK      | Case-control | 86/134             | 10/5; 3.4 (1.1-11.2)                                              |

Abbreviation: NA, not available.

**eTable 13.** Characteristics of Included Studies for the Class of Gastrointestinal Tract Medications

| First author, year, country           | Study design | Case/Control group | Case/control numbers and odds ratio (95% confidence interval) for |                                  |     |
|---------------------------------------|--------------|--------------------|-------------------------------------------------------------------|----------------------------------|-----|
|                                       |              |                    | Proton pump inhibitors                                            | Histamine-2 receptor antagonists | Any |
| Benzaquen, 2018, <sup>41</sup> France | Case-control | 61/122             | 28/59                                                             | NA                               | NA  |
| Lloyd-Lavery, 2013, <sup>21</sup> UK  | Case-control | 86/134             | 13/20                                                             | 4/2                              | NA  |
| Tan, 2017, <sup>45</sup> Singapore    | Case-control | 105/315            | 7/16                                                              | 3/9                              | NA  |

Abbreviation: NA, not available.

**Figure 1.** Association Between Use of Psycholeptics and Bullous Pemphigoid

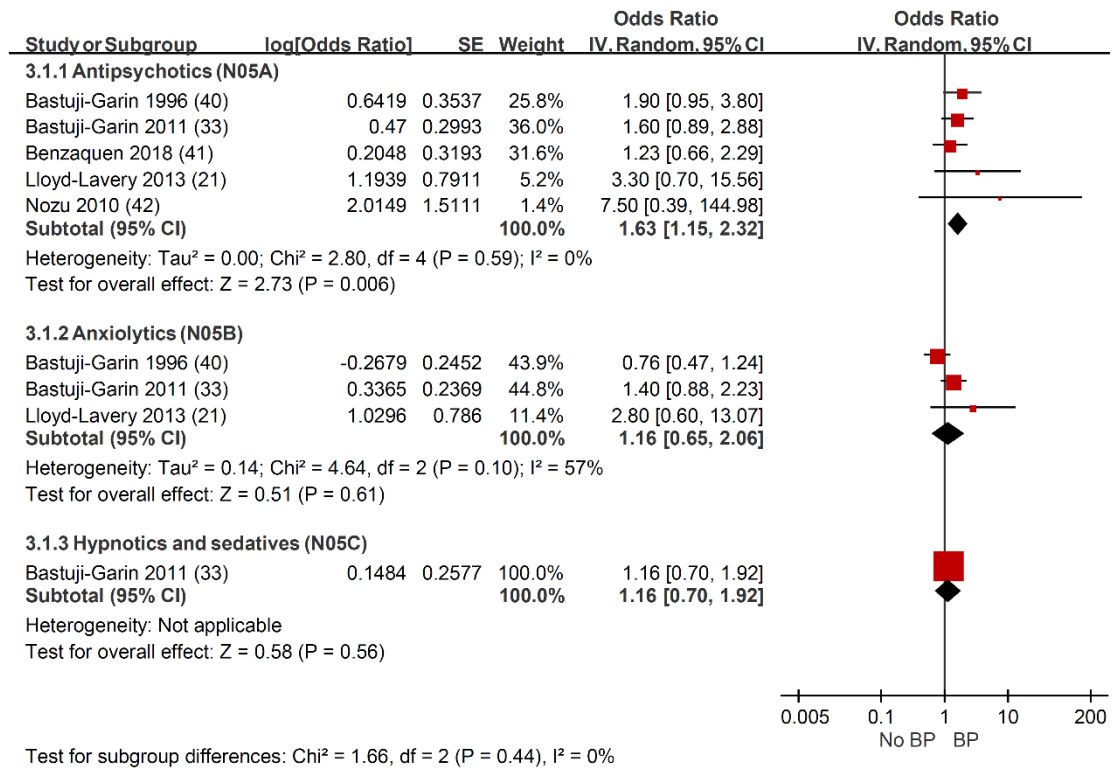

**eFigure 2.** Association Between Use of Analgesics and Bullous Pemphigoid

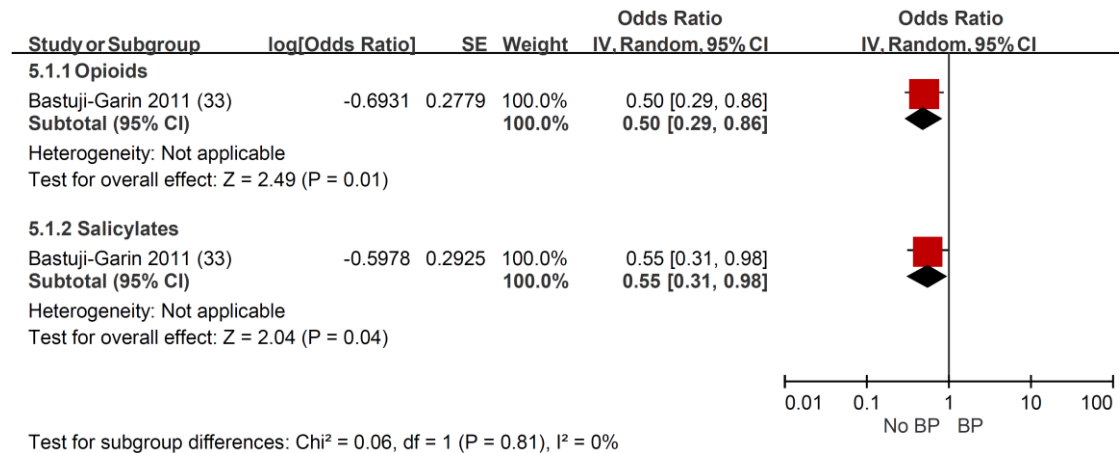

**Figure 3.** Association Between Use of Antihypertensive Drugs and Bullous Pemphigoid. Abbreviation: ACEI, angiotensin-converting-enzyme inhibitors; ARB, angiotensin II receptor blockers; CCB, calcium channel blocker.

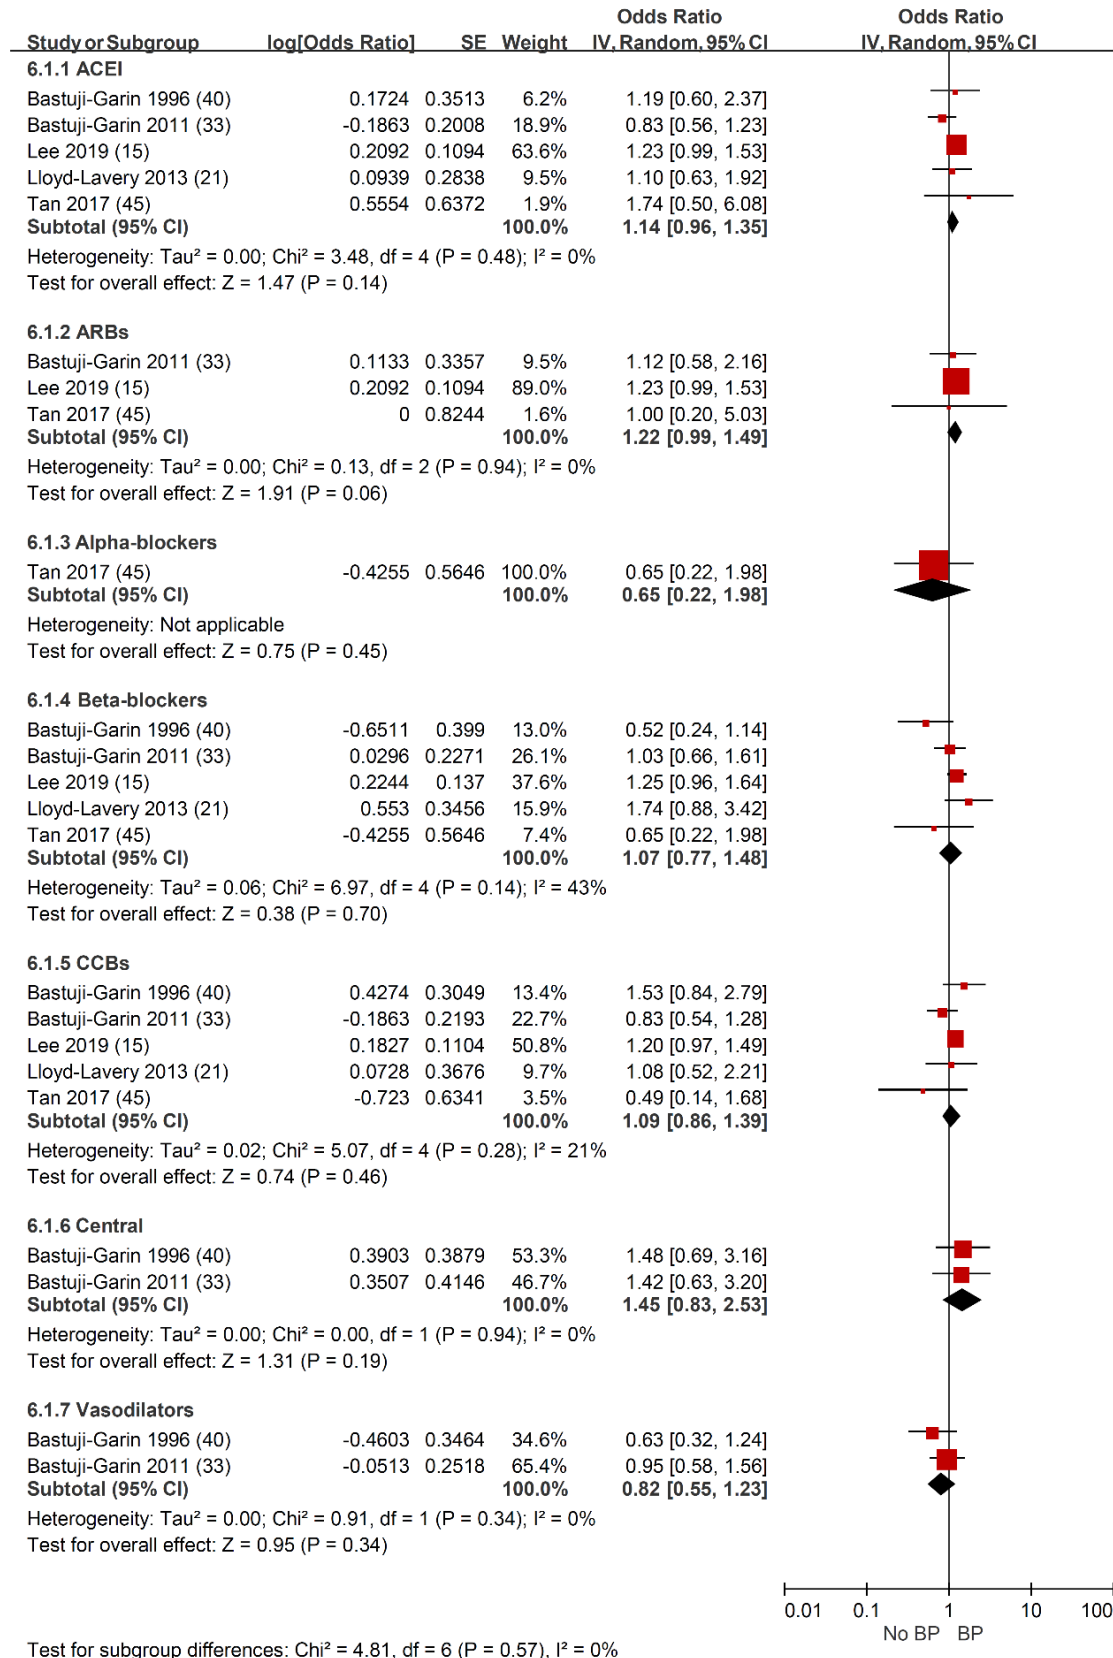

**eFigure 4. Association Between Use of Antithrombotics and Bullous Pemphigoid**

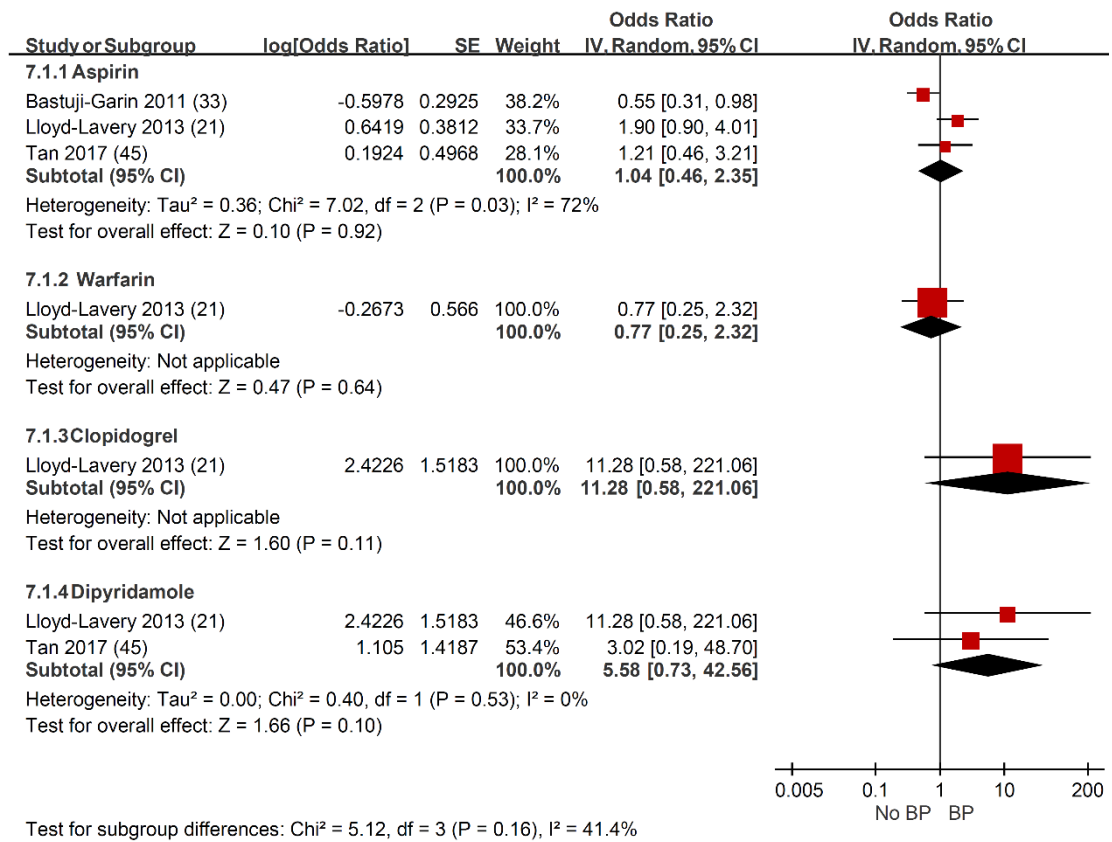

**eFigure 5.** Association Between Use of Lipid-Lowering Agents and Bullous Pemphigoid

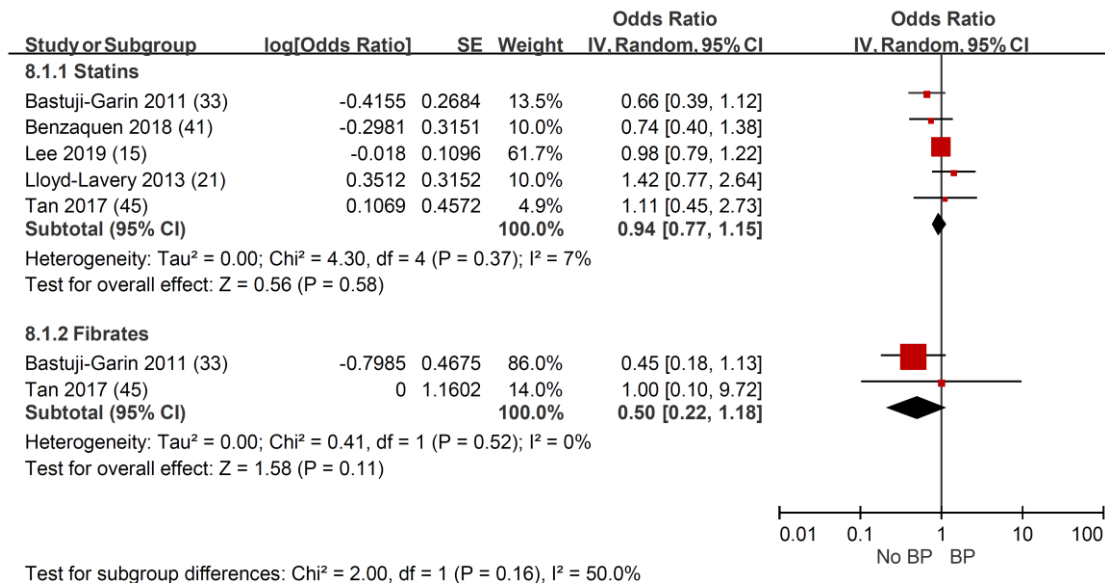

**eFigure 6.** Association Between Use of Antidepressants and Bullous Pemphigoid. Abbreviation: SNRI, serotonin–norepinephrine reuptake inhibitor; SSRI, selective serotonin reuptake inhibitor; TCA, tricyclic antidepressant; TeCA, tetracyclic antidepressant.

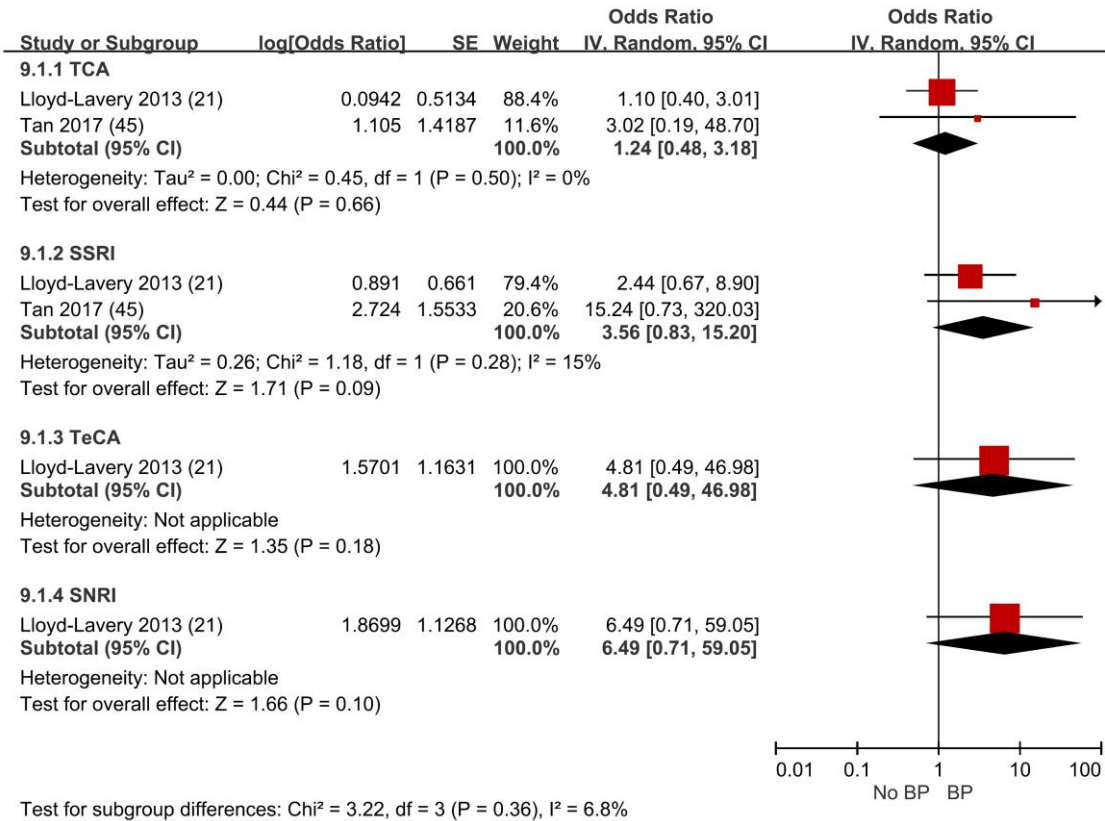



**eFigure 7.** Association Between Use of Nonsteroidal Anti-inflammatory Drugs and Bullous Pemphigoid

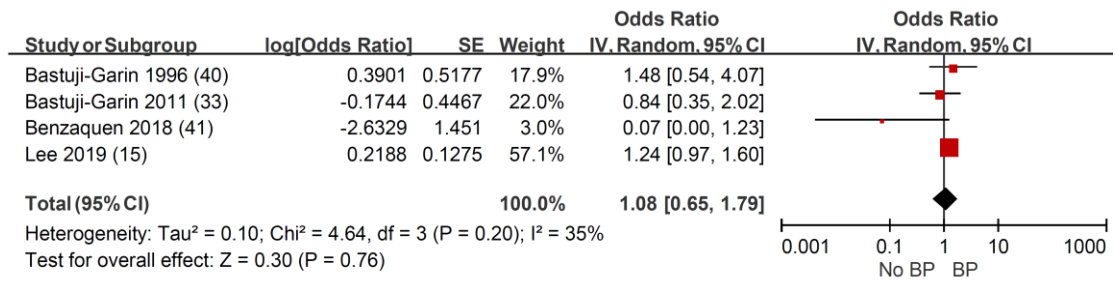

**eFigure 8.** Association Between Use of Antibiotics and Bullous Pemphigoid

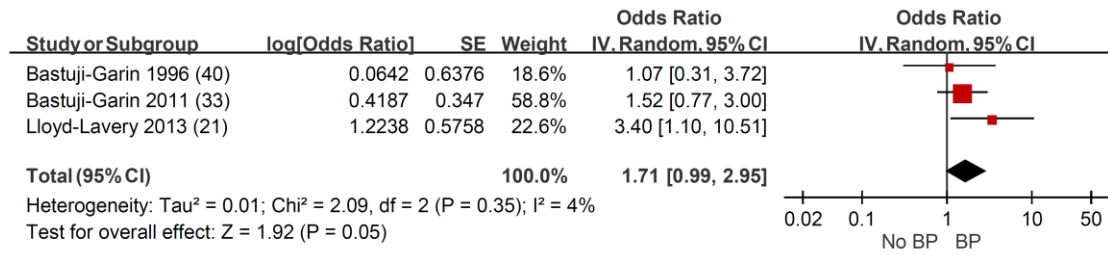

**eFigure 9.** Association Between Use of Gastrointestinal Tract Drugs and Bullous Pemphigoid

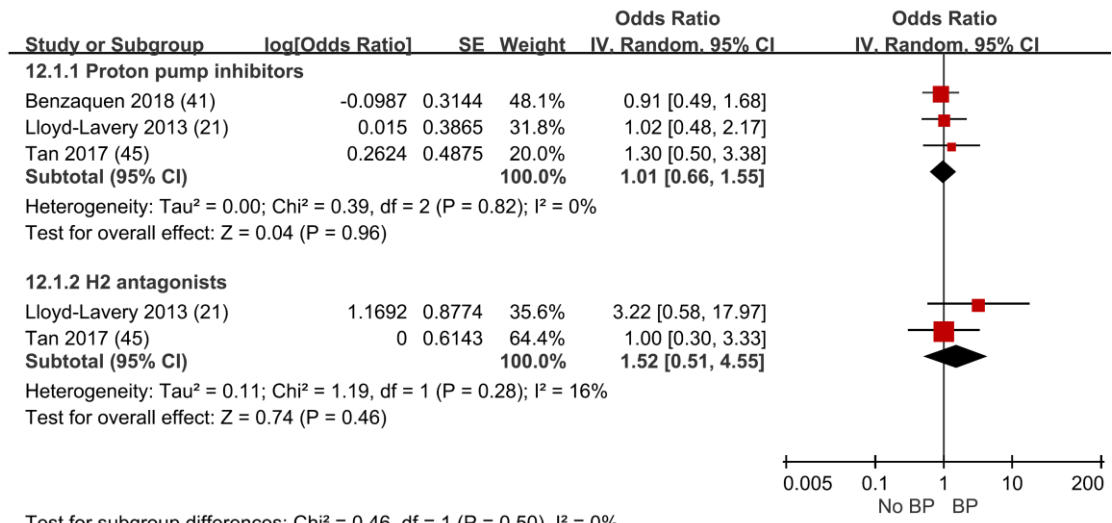

**eFigure 10.** Sensitivity Analysis on Association Between Antidiabetic Drugs and Bullous Pemphigoid

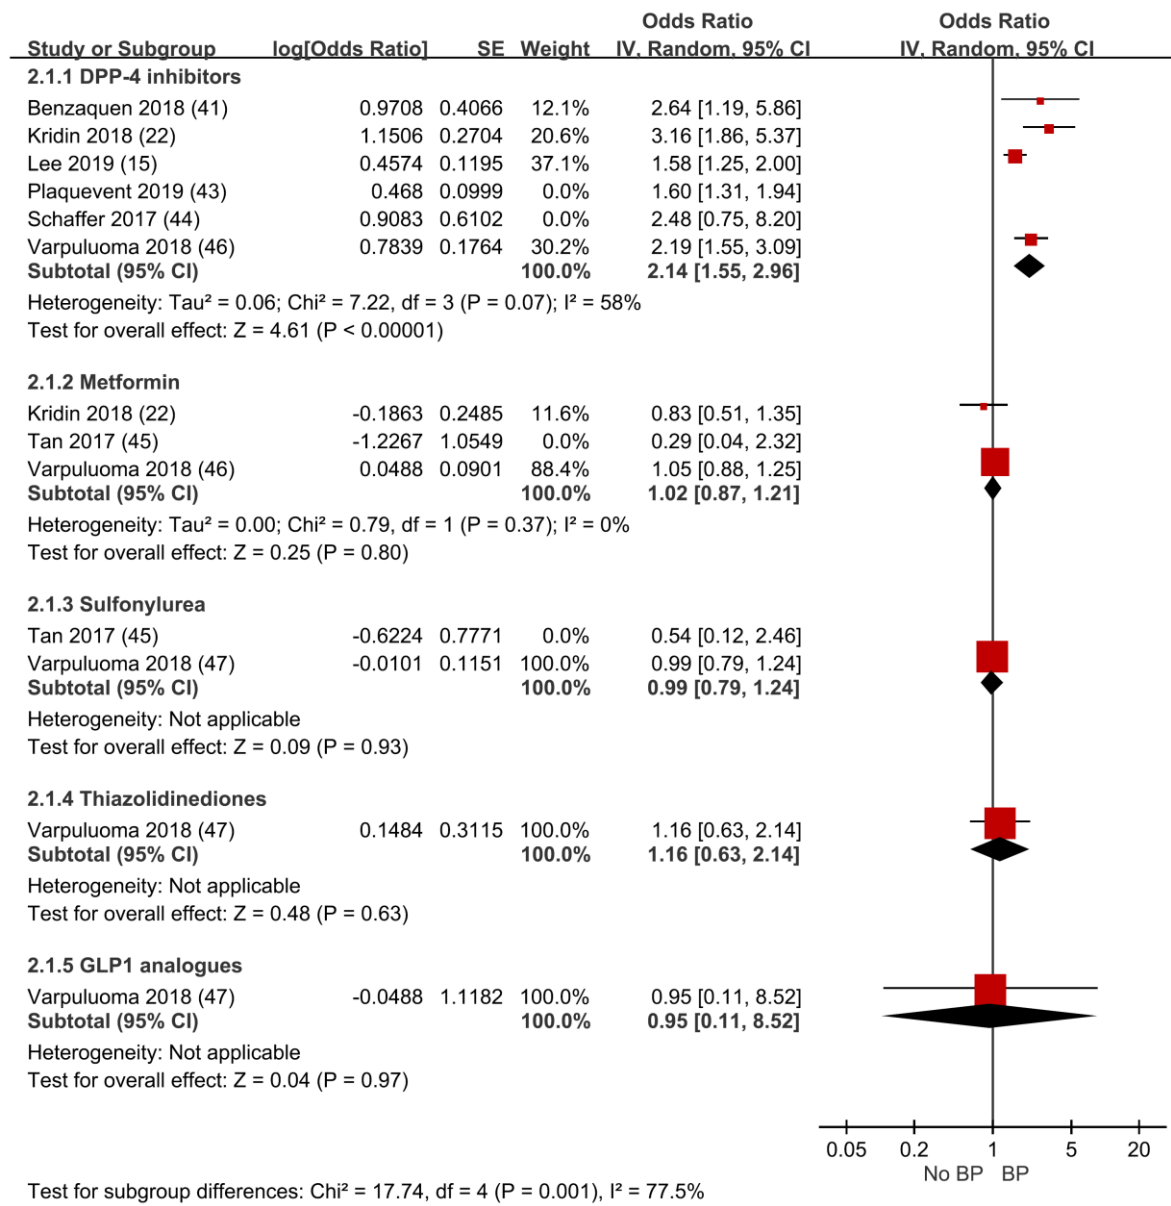

**eFigure 11. Sensitivity Analysis on Association Between Psycholeptics and Bullous Pemphigoid**

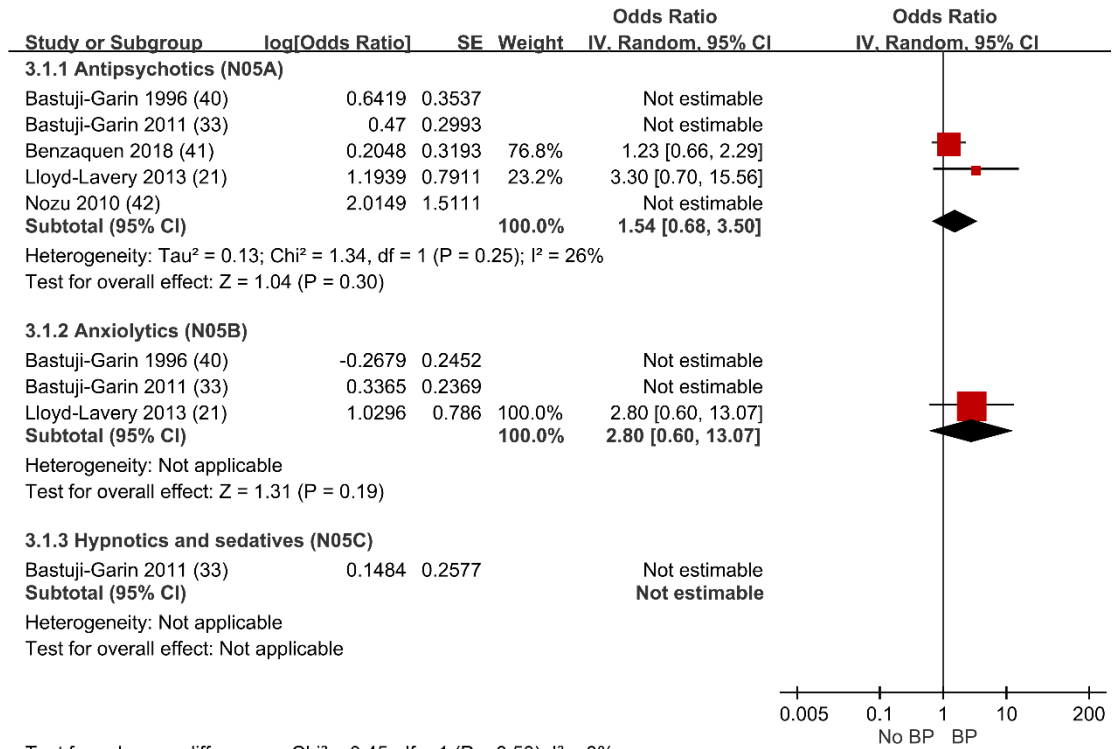

**eFigure 12.** Sensitivity Analysis on Association Between Anti-Parkinson Drugs and Bullous Pemphigoid

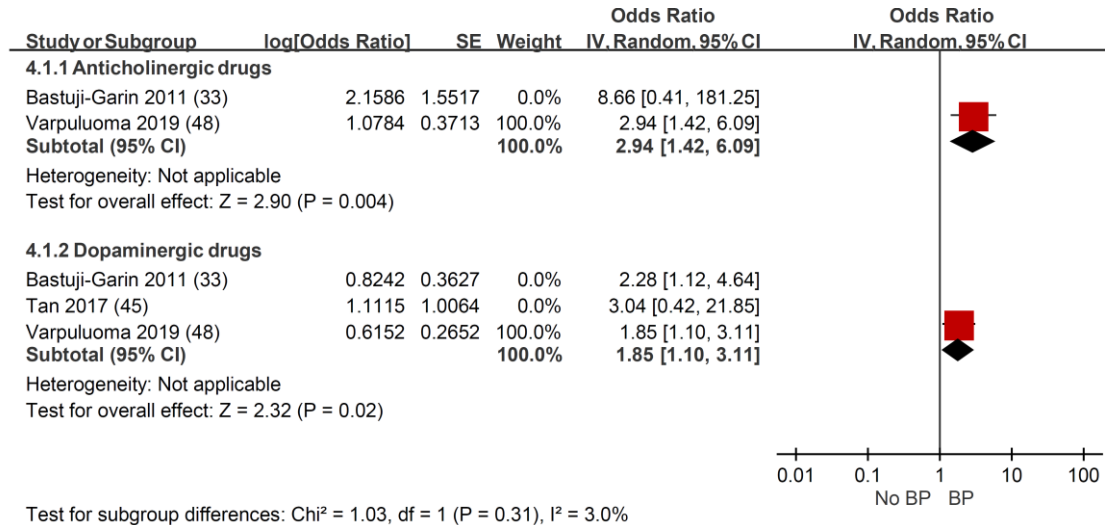

Supplement: jamadermatol-156-891-s001.pdf [file jamadermatol-156-891-s001.pdf]
